# Supplementary material for: Balanced strain-dependent carrier dynamics in flexible organic–inorganic hybrid perovskites
Source: Royal Society of Chemistry journal article supplement (doi:10.1039/c9tc05763c), 2020-01-01
Supplement: c9tc05763c1.pdf [file c9tc05763c1.pdf]

## Supplementary Information

### Balanced strain-dependent carrier dynamics in flexible organic-inorganic hybrid perovskites

Cheng Wang,<sup>a</sup> Lin Ma,<sup>\*a</sup> Deqiang Guo,<sup>a</sup> Xin Zhao,<sup>a</sup> Zilin Zhou,<sup>a</sup> Dabin Lin,<sup>a</sup> Fangteng Zhang,<sup>a</sup> Weiren Zhao,<sup>a</sup> Jiahua Zhang<sup>b</sup> and Zhaogang Nie<sup>\*a</sup>

<sup>a</sup>School of Physics and Optoelectronic Engineering, Guangdong University of Technology, Guangzhou, China

<sup>b</sup>State Key Laboratory of Luminescence and Applications, CIOMP, Chinese Academy of Sciences, Changchun, China

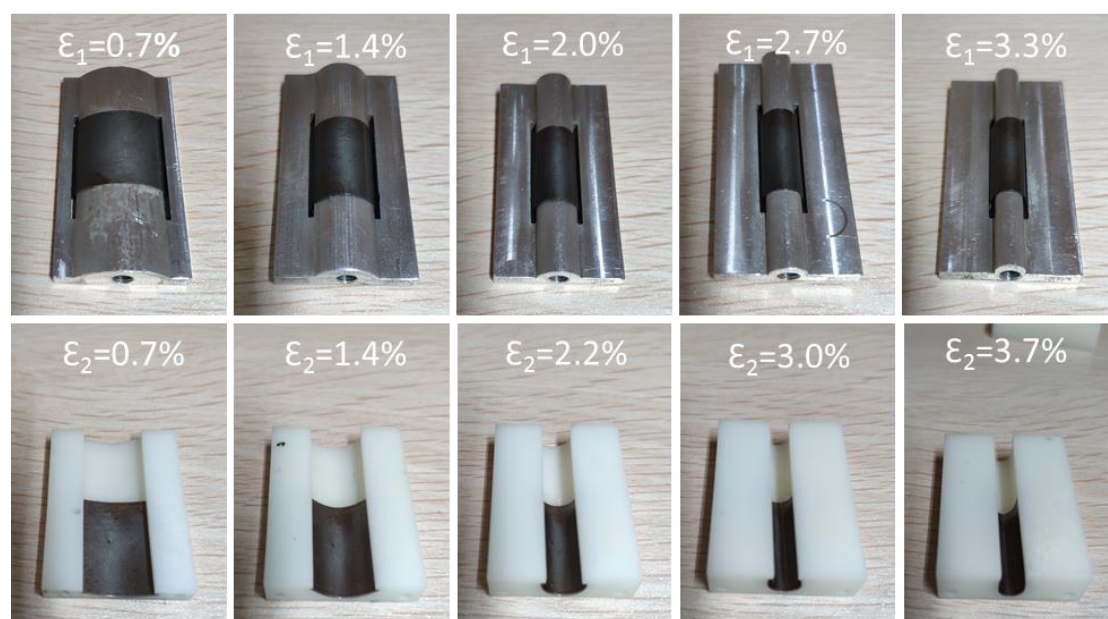

**Fig. S1** Images of convex and concave bending molds (with perovskite film attached).

**Table S1.** The tensile ( $\varepsilon_1$ ) or compressive ( $\varepsilon_2$ ) strains applied and corresponding bending radius.

|                 |                                        |       |      |      |      |      |
|-----------------|----------------------------------------|-------|------|------|------|------|
| Convex bending  | Bending radius $r$ (mm)                | 12.75 | 6.50 | 4.42 | 3.38 | 2.75 |
|                 | Tensile strain $\varepsilon_1$ (%)     | 0.7   | 1.4  | 2.0  | 2.7  | 3.3  |
| Concave bending | Bending radius $r$ (mm)                | 12.25 | 6.00 | 3.92 | 2.88 | 2.25 |
|                 | Compressive strain $\varepsilon_2$ (%) | 0.7   | 1.4  | 2.2  | 3.0  | 3.7  |

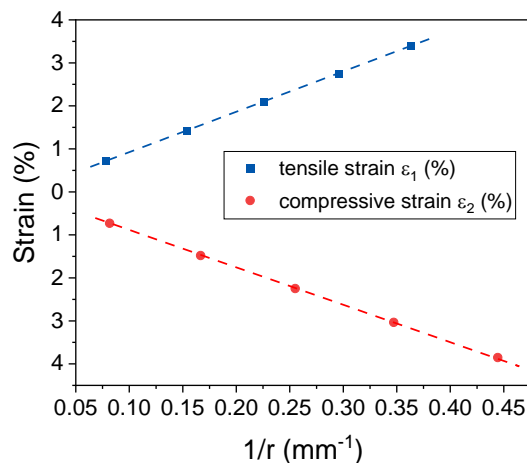**Figure S2.** The relation between applied strain versus the reciprocal bending radius shown in table S1 (the dash lines are for eye guidance).**Table S2.** Fitting parameters of time-resolve PL kinetics of MAPbI<sub>3</sub> film under different strain.

| Strain                | $\tau_1$ (ns)  | $A_1$ | $\tau_2$ (ns) | $A_2$ | $\tau_3$ (ns) | $A_3$ | $\tau_{\text{average}}$ (ns) |
|-----------------------|----------------|-------|---------------|-------|---------------|-------|------------------------------|
| $\varepsilon_1=0\%$   | $1.71\pm 0.01$ | 0.80  | $13.7\pm 0.2$ | 0.17  | $199\pm 3$    | 0.03  | 9.32                         |
| $\varepsilon_1=0.7\%$ | $1.64\pm 0.01$ | 0.79  | $13.2\pm 0.2$ | 0.18  | $177\pm 3$    | 0.03  | 9.10                         |
| $\varepsilon_1=1.4\%$ | $1.78\pm 0.01$ | 0.74  | $15.6\pm 0.2$ | 0.21  | $195\pm 2$    | 0.05  | 13.54                        |
| $\varepsilon_1=2.0\%$ | $1.92\pm 0.02$ | 0.74  | $16.8\pm 0.2$ | 0.22  | $172\pm 3$    | 0.04  | 12.59                        |
| $\varepsilon_1=2.7\%$ | $2.12\pm 0.02$ | 0.71  | $17.2\pm 0.2$ | 0.24  | $180\pm 2$    | 0.05  | 14.84                        |
| $\varepsilon_1=3.3\%$ | $2.47\pm 0.02$ | 0.62  | $20.9\pm 0.2$ | 0.30  | $164\pm 2$    | 0.07  | 19.83                        |

|                       |           |      |          |      |       |      |       |
|-----------------------|-----------|------|----------|------|-------|------|-------|
| $\varepsilon_2=0.7\%$ | 1.03±0.01 | 0.80 | 11.7±0.4 | 0.14 | 141±2 | 0.07 | 12.14 |
| $\varepsilon_2=1.4\%$ | 1.20±0.02 | 0.81 | 11.3±0.4 | 0.14 | 141±3 | 0.06 | 10.67 |
| $\varepsilon_2=2.2\%$ | 1.14±0.01 | 0.84 | 10.5±0.3 | 0.13 | 140±4 | 0.04 | 7.27  |
| $\varepsilon_2=3.0\%$ | 1.13±0.01 | 0.84 | 10.1±0.3 | 0.13 | 145±4 | 0.03 | 6.85  |
| $\varepsilon_2=3.7\%$ | 1.24±0.01 | 0.84 | 10.3±0.3 | 0.14 | 137±6 | 0.02 | 5.63  |

The time-resolved PL kinetics were fitted using three-exponential decay equation (S1):

$$I(t) = B + A_1 \times e^{\frac{-t}{\tau_1}} + A_2 \times e^{\frac{-t}{\tau_2}} + A_3 \times e^{\frac{-t}{\tau_3}} \quad (S1)$$

where  $A_1, A_2, A_3$  are the amplitudes of each decay component, and  $\tau_1, \tau_2, \tau_3$  are the decay time of each decay component.  $B$  is the background constant. The average lifetime  $\tau_{average}$  is determined by the following equation:

$$\tau_{average} = \frac{A_1\tau_1 + A_2\tau_2 + A_3\tau_3}{A_1 + A_2 + A_3} \quad (S2)$$

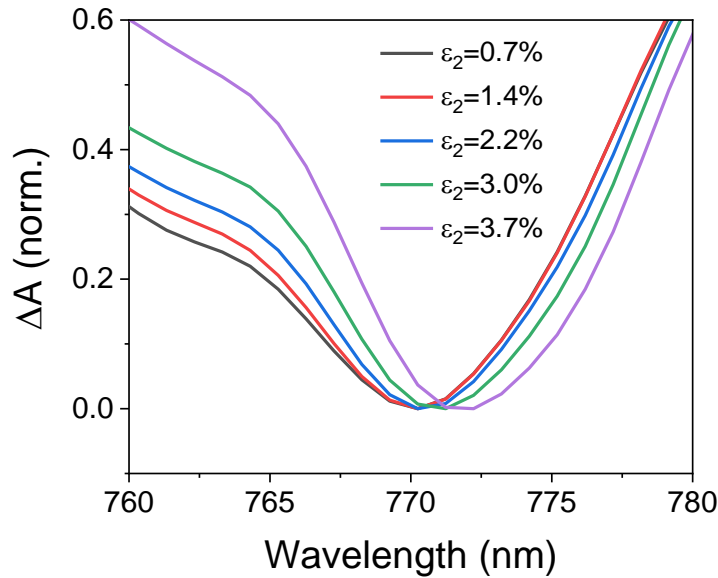

**Fig. S3** Partial enlargement of transient absorption spectra of MAPbI<sub>3</sub> film at 9 ps after excitation ( $\lambda_{pump}=650$  nm) under different compressive strains via concave bending.

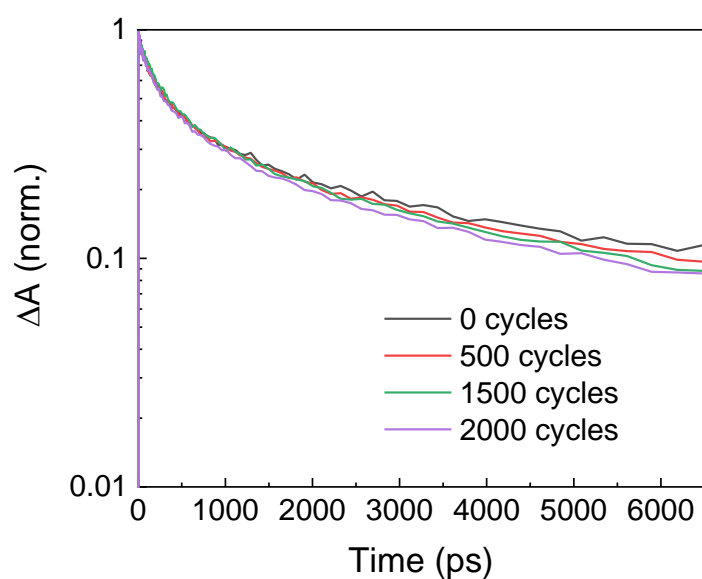

**Fig. S4** Carrier dynamics in a flexible MAPbI<sub>3</sub> film versus bending cycles under convex bending radius of 1.1 mm.

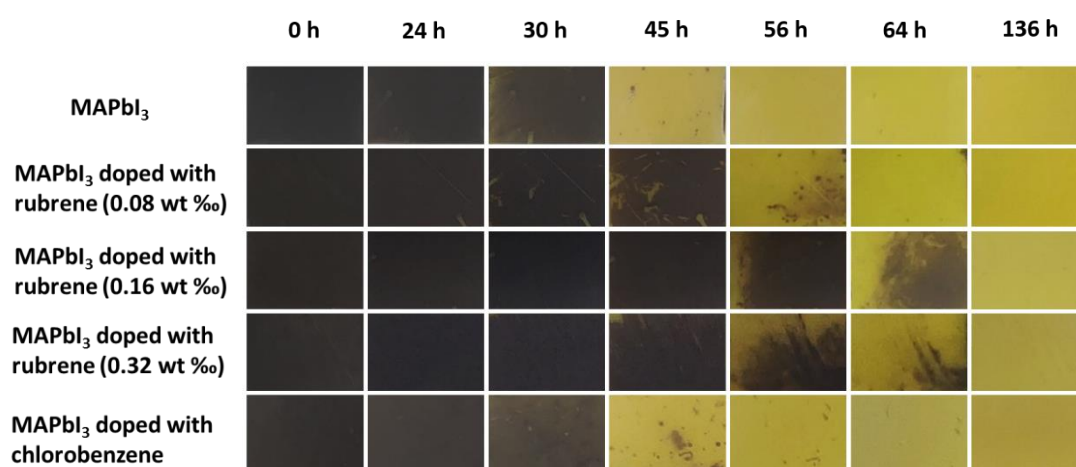

**Fig. S5** Stabilities of MAPbI<sub>3</sub> film doped with rubrene at various concentrations.

The stabilities of rubrene doped MAPbI<sub>3</sub> films with various doping concentrations are shown in Figure S5. To investigate the influence of chlorobenzene solvent, the stability of MAPbI<sub>3</sub> film with adding chlorobenzene into the precursor solution was also recorded which shows no noticeable impact on the perovskite film stability.

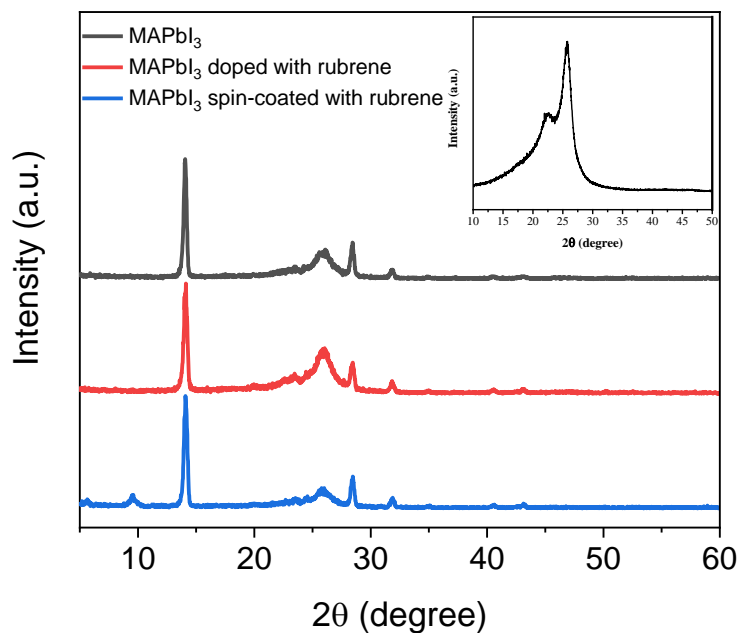

**Fig. S6** GIXRD diffraction patterns of pristine MAPbI<sub>3</sub>, MAPbI<sub>3</sub> doped with rubrene, and MAPbI<sub>3</sub> spin-coated with rubrene on PET films. The inset shows the GIXRD diffraction pattern of PET substrate.

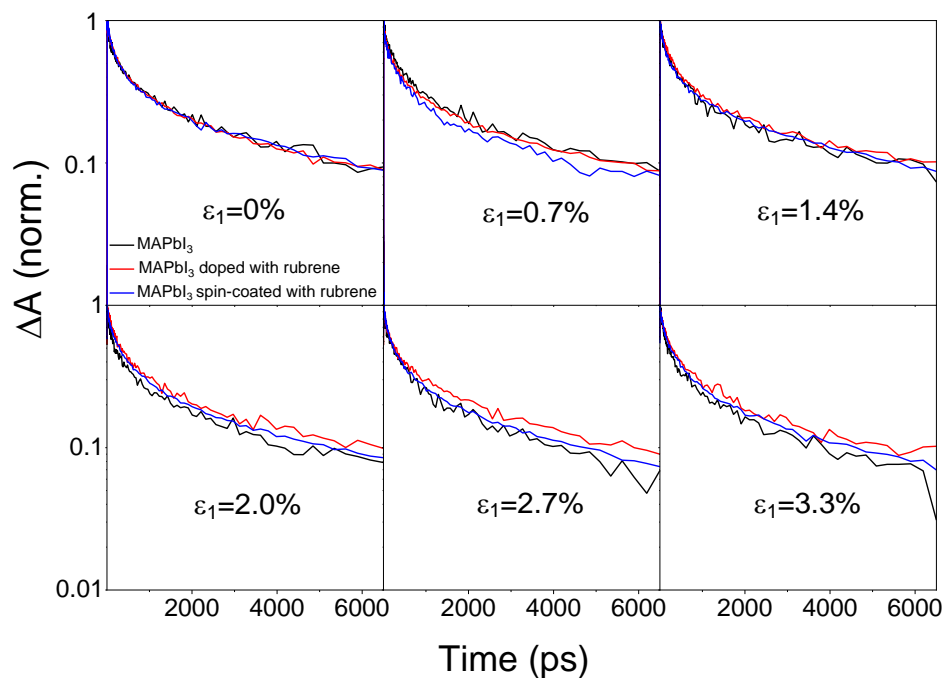

**Fig. S7** TA kinetics at 760 nm of pristine MAPbI<sub>3</sub> (black), MAPbI<sub>3</sub> doped with rubrene (red), and MAPbI<sub>3</sub> spin-coated with rubrene (blue) films under various tensile strains.
